# Supplementary material
Source: publisher figshare collection journal article supplement (https://gsapubs.figshare.com/articles/dataset/_/12541076)

**Chen, X., Chen, H., Sobel, E.R., Lin, X., Cheng, X., Yan, J., and Yang, S.,  
Convergence of the Pamir and the South Tian Shan in the late Cenozoic: Insights  
from provenance analysis in the Wuheshalu section at the convergence area:  
Lithosphere, <https://doi.org/10.1130/L1028.1.1>.**

**GSA Data Repository Item 2019161**

Supporting Information for

**Convergence of the Pamir and the South Tian Shan in the late  
Cenozoic: insights from provenance analysis in the Wuheshalu  
Section at the convergence area**

**Xinwei Chen<sup>a,b,c,d</sup>, Hanlin Chen<sup>a,b\*</sup>, Edward R. Sobel<sup>d</sup>, Xiubin Lin<sup>a,b</sup>, Xiaogan  
Cheng<sup>a,b</sup>, Jiakai Yan<sup>a,b</sup>, Shaomei Yang<sup>a,b</sup>**

<sup>a</sup> School of Earth Sciences, Zhejiang University, Hangzhou 310027, China;

<sup>b</sup> Research Center for Structures in Oil- and Gas-Bearing Basins, Ministry of Education,  
Hangzhou 310027, China;

<sup>c</sup> Key Laboratory of Tectonic Controls on Mineralization and Hydrocarbon Accumulation  
of Ministry of Land and Resource, Chengdu University of Technology, Chengdu 610059,

China;<sup>d</sup> Universitaet Potsdam, Institut für Erd- und Umweltwissenschaften, Karl-  
Liebknecht-Strasse 24, Potsdam 14476, Germany.

**Contents of this file**

Table A1

Figure S1, S2 and S3

## **Introduction**

The supporting information includes table that provide detailed information about detrital zircon U-Pb analytical data and figures about representative CL images of zircons, U-Pb concordia diagrams of the analyzed samples and Photographs of the four sites (Gc-1, Gc-2, Gc-3 and Gc-4) for conglomerate clast counting in the Wuheshalu Section

**Figure S1.** Representative CL images of zircons from the analyzed samples in the Wuheshalu Section. White circles show locations of U-Pb analysis.

**Figure S2.** U-Pb concordia diagrams for zircon grains (ages < 1000Ma) from the Wuheshalu Section.

**Figure S3.** Photographs of the four sites (Gc-1, Gc-2, Gc-3 and Gc-4) for conglomerate clast counting in the Wuheshalu Section. Positions are shown in [Figs.1c and 5](#). Gravels in the white 1m×1m area have been counted.

## WHSL-1

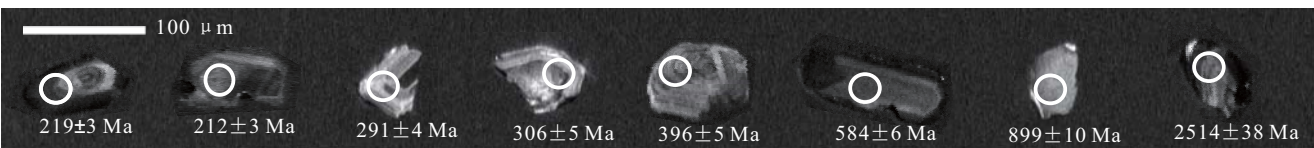

## WHSL-2

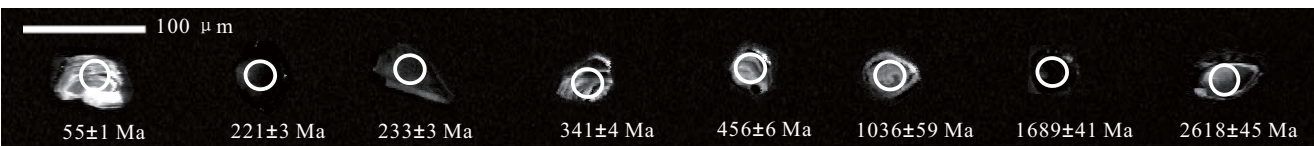

## WHSL-3

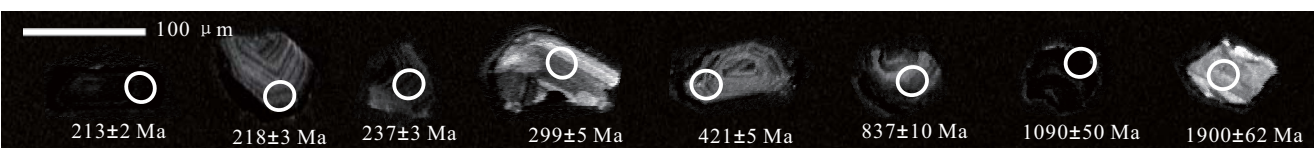

## WHSL-4

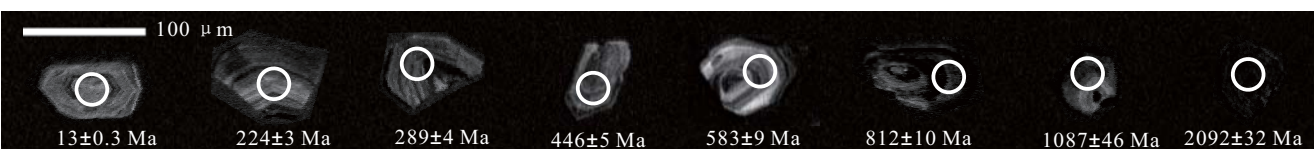

## WHSL-5

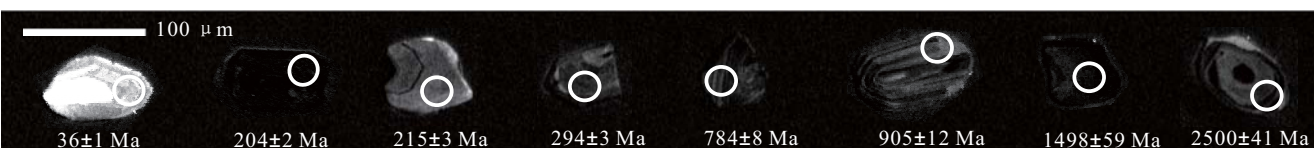

## WHSL-6

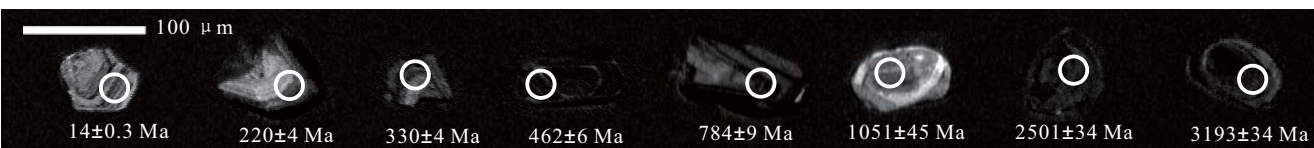

## WHSL-7

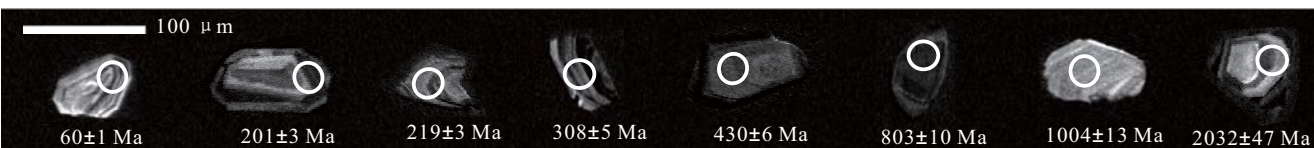

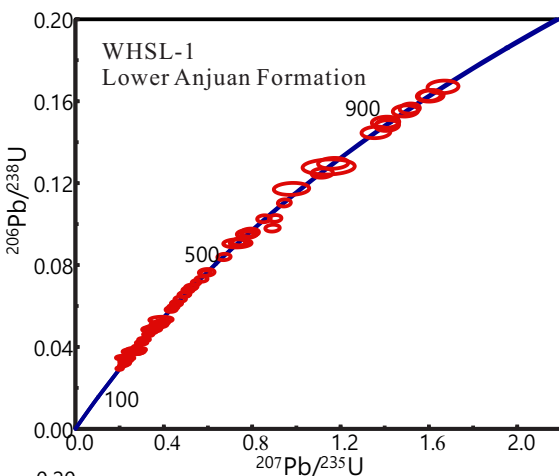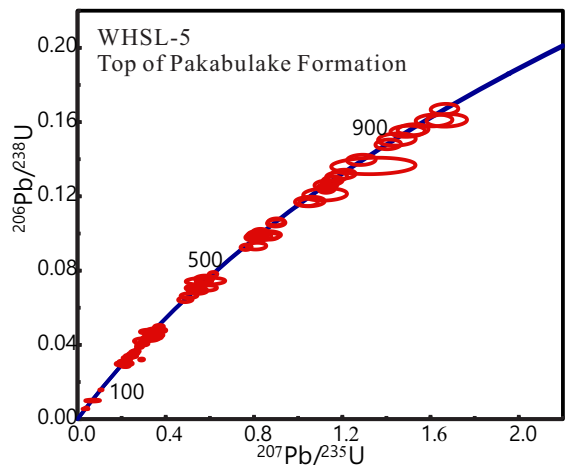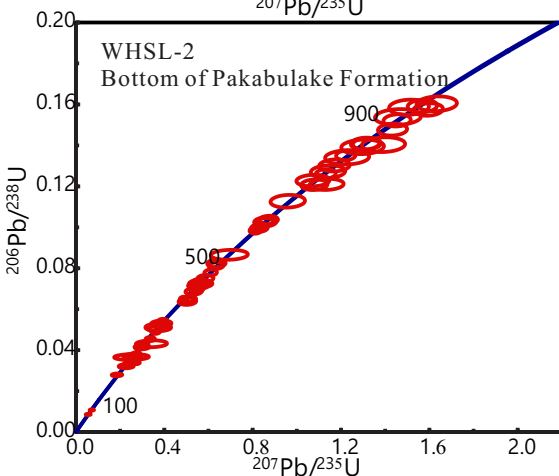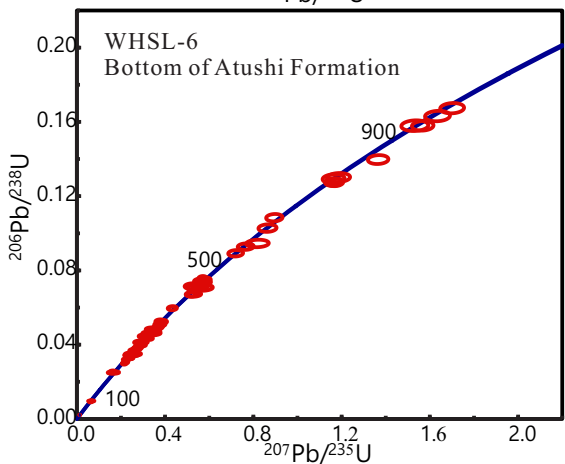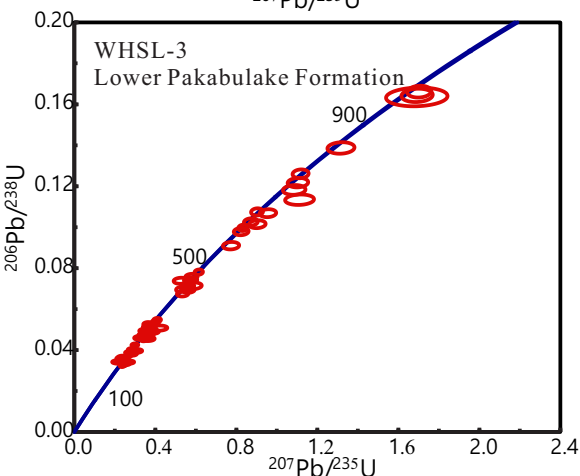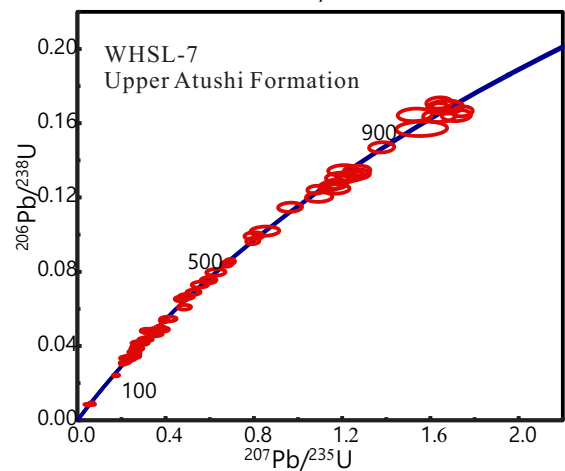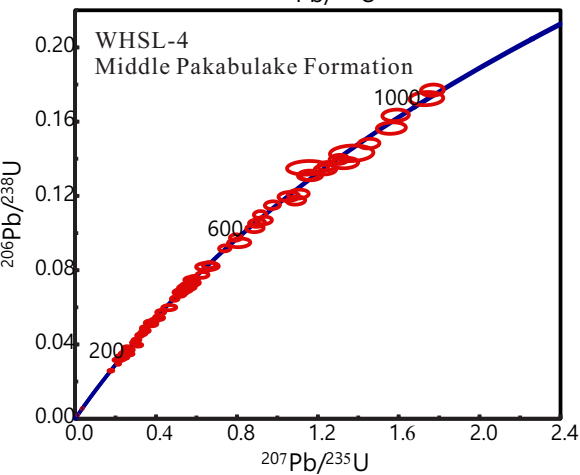



Gc-1

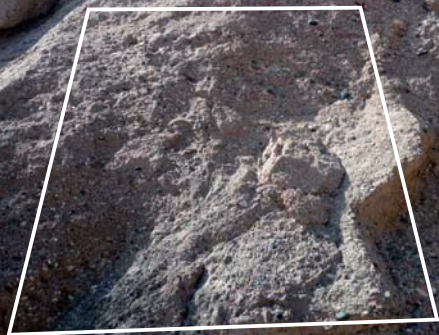

Gc-2

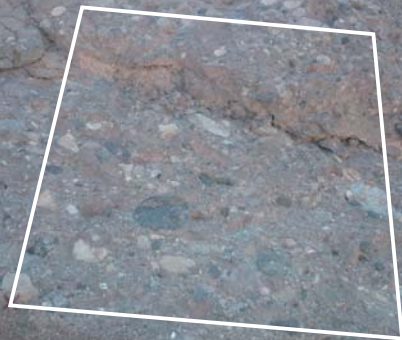

Gc-3

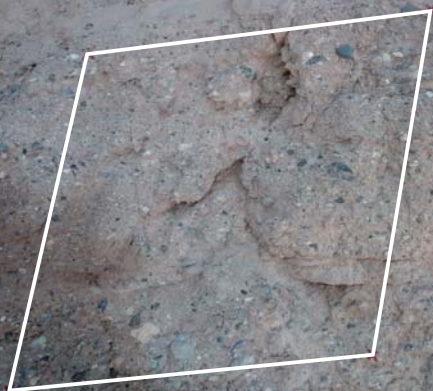

Gc-4

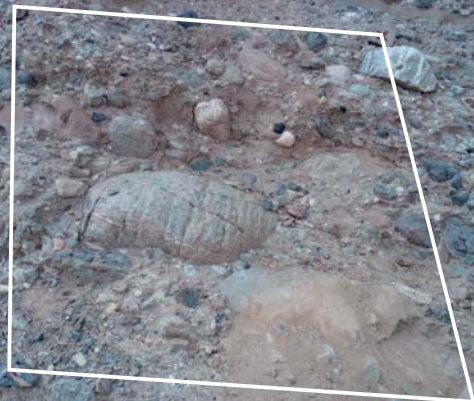

Supplement: Supplementary file 1 [file 1]
